# Supplementary material for: Atypical integrative element with strand-biased circularization activity assists interspecies antimicrobial resistance gene transfer from Vibrio alfacsensis
Source: PubMed Central journal article supplement (PMC9345347; doi:10.1371/journal.pone.0271627), 2022-08-02

X X X

X X X

FIG4\_B-i

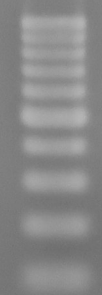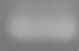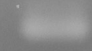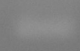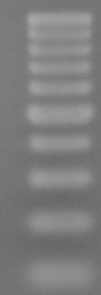

FIG4\_B-ii

X X

X X X X

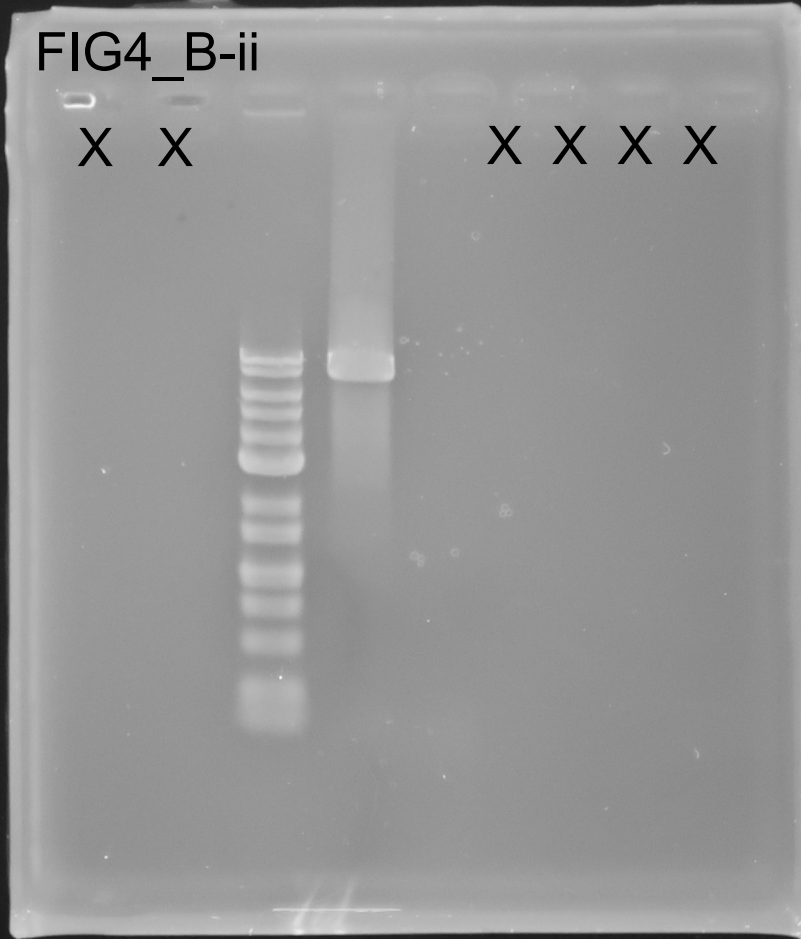

S5\_FIG\_panelB

X X

X

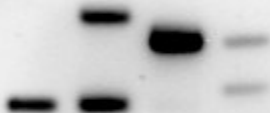

S5\_FIG\_panelC\_upper-left&lower-left

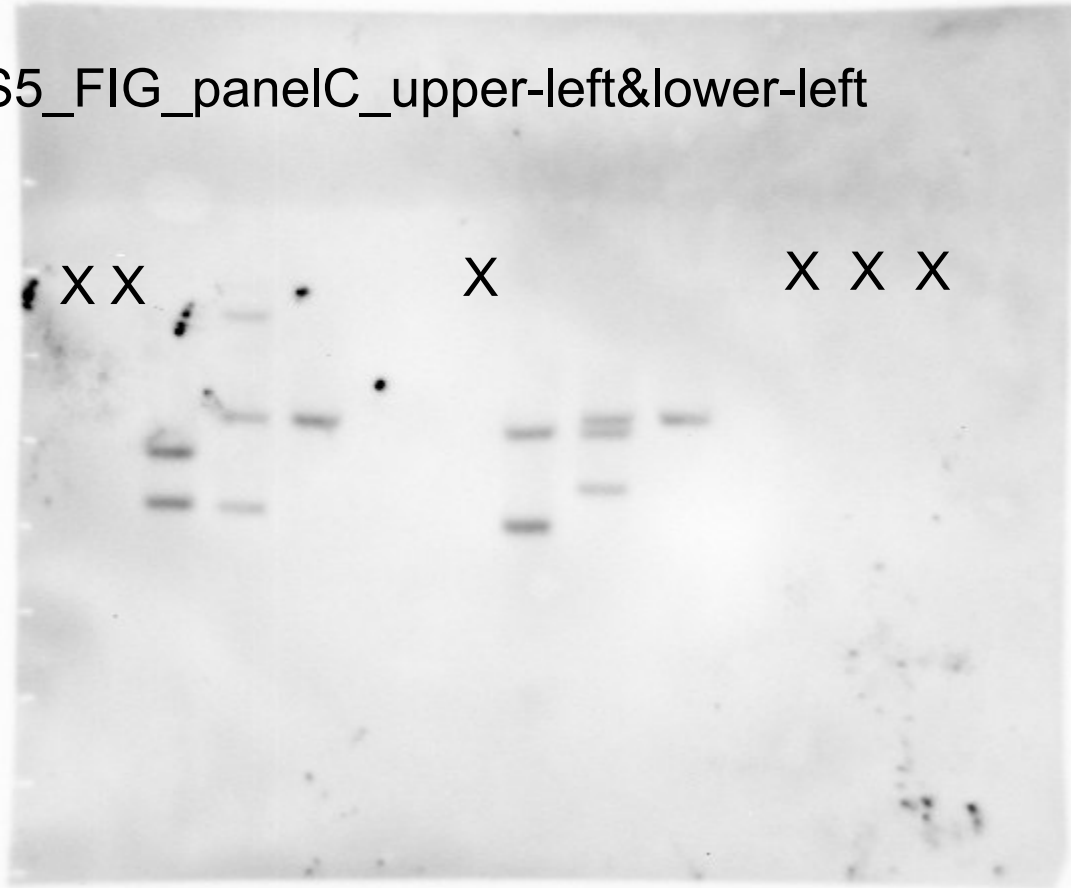

S5\_FIG\_panelC\_upper\_center

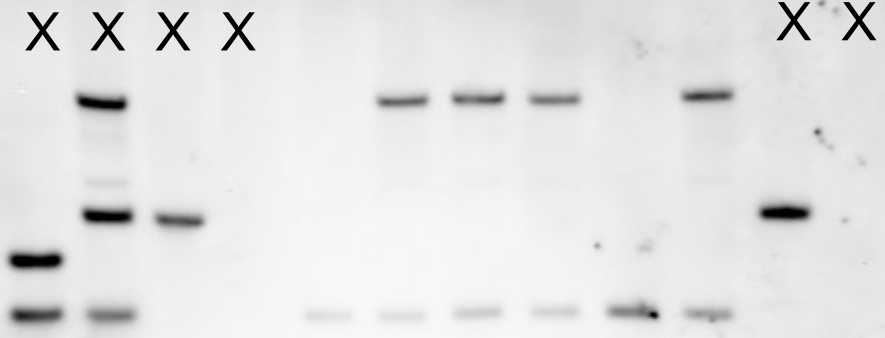

S5\_FIG\_panelC\_upper\_right

X

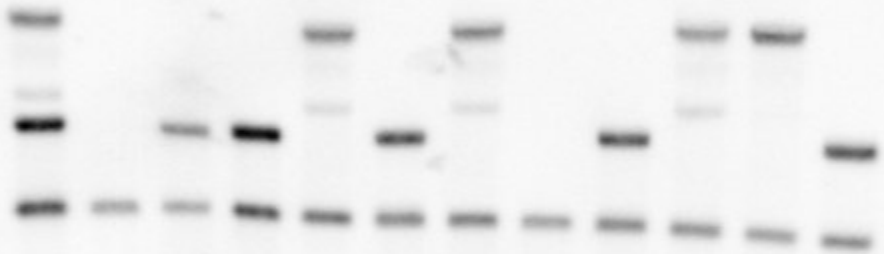

S5\_FIG\_panelC\_lower\_center

X X X X

X

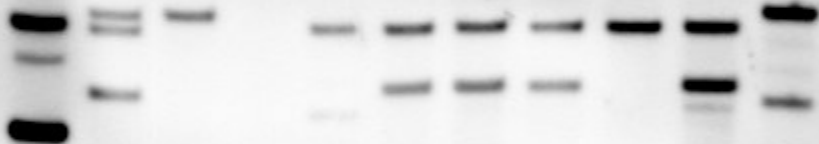

S5\_FIG\_panelC\_lower\_right

X

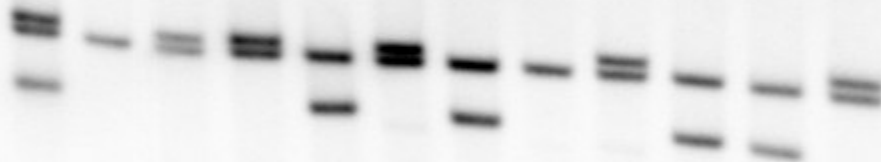



X X X

X X X X

S6\_FIG\_panelA\_right

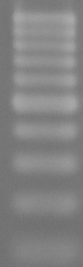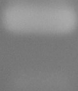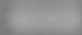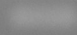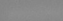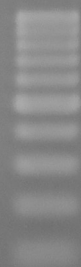

X X X

X X X

S6\_FIG\_panelA\_left

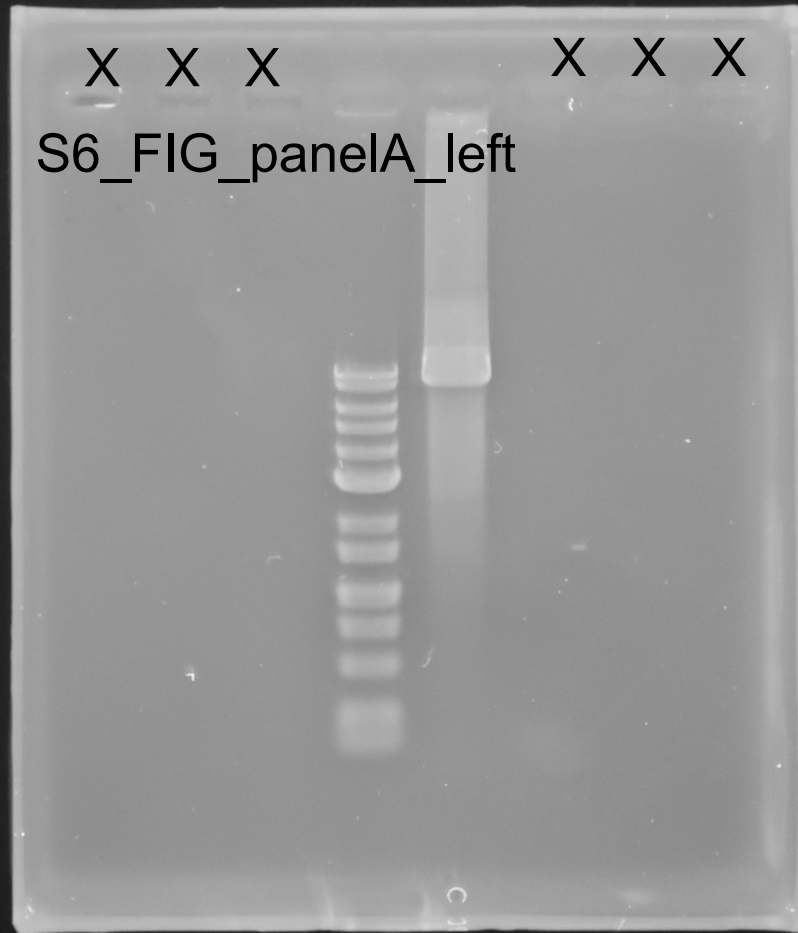

S6\_FIG\_panelC

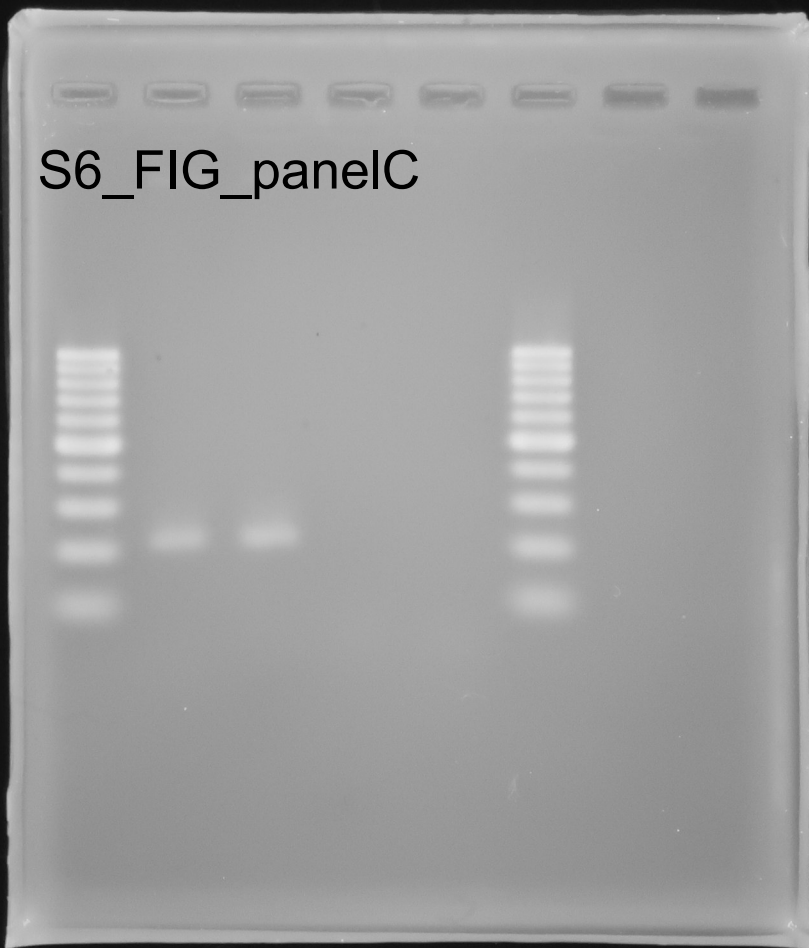

Supplement: pone.0271627.s011.pdf [file pone.0271627.s011.pdf]
